# Supplementary material for: Lace Up and Mindfulness: A Randomized Controlled Trial Intervention to Reduce Emotional Eating, Anxiety, and Sleep Disturbances in Latinx and Black Youth
Source: MDPI journal article supplement (doi:10.3390/children10030538), 2023-03-10
Supplement: s1 [file s1]

**Supplemental Tables S1.** Comparison of Sample Descriptive Characteristics at Baseline Between the Retained and Excluded Participants (N\_final = 148, N\_excluded = 61).

| Variables                            | Retained     | Excluded     | <i>df</i> | <i>t</i>      | $\chi^2$ | <i>p</i> | Cohen's <i>d</i> | Cramer's <i>V</i> |
|--------------------------------------|--------------|--------------|-----------|---------------|----------|----------|------------------|-------------------|
| Age in years, <i>M</i> ( <i>SD</i> ) | 10.11 (1.33) | 10.49 (1.46) | 207       | -<br>1.8<br>1 |          | .07      | 0.28             |                   |
|                                      | <i>N</i> (%) |              |           |               |          |          |                  |                   |
| Gender                               |              |              | 1         |               | 0.07     | .79      |                  | .02               |
| Boy                                  | 71 (48.0)    | 30 (50.0)    |           |               |          |          |                  |                   |
| Girl                                 | 77 (52.0)    | 30 (50.0)    |           |               |          |          |                  |                   |
| Ethnicity                            |              |              | 2         |               | 5.9      | .05*     |                  | .17               |
| Latinx                               | 107 (72.3)   | 35 (60.3)    |           |               |          |          |                  |                   |
| Black                                | 28 (18.9)    | 20 (34.5)    |           |               |          |          |                  |                   |
| Multiracial/<br>Other                | 13 (8.8)     | 3 (5.2)      |           |               |          |          |                  |                   |
| Place of birth                       |              |              | 3         |               | 5.44     | .14      |                  | .17               |
| U.S.                                 | 134 (90.5)   | 47 (95.9)    |           |               |          |          |                  |                   |
| Mexico                               | 8 (5.4)      | 0 (0.0)      |           |               |          |          |                  |                   |
| Central<br>America                   | 2 (1.4)      | 2 (1.4)      |           |               |          |          |                  |                   |
| Other                                | 4 (2.7)      | 0 (0.0)      |           |               |          |          |                  |                   |
| Acculturation                        |              |              | 1         |               | 0.95     | .33      |                  | .08               |
| High                                 | 78 (74.3)    | 32 (82.1)    |           |               |          |          |                  |                   |
| Low                                  | 27 (25.7)    | 7 (17.9)     |           |               |          |          |                  |                   |
| Obesity status                       |              |              | 3         |               | 2.66     | .45      |                  | .12               |
| Underweight                          | 5 (3.4)      | 0 (0.0)      |           |               |          |          |                  |                   |
| Normal weight                        | 58 (39.2)    | 23 (37.7)    |           |               |          |          |                  |                   |
| Overweight                           | 24 (16.2)    | 8 (13.1)     |           |               |          |          |                  |                   |
| Obese                                | 53 (35.8)    | 25 (41.0)    |           |               |          |          |                  |                   |
| Unreported                           | 8 (5.4)      | 3 (4.9)      |           |               |          |          |                  |                   |
| Percent body fat                     | 27.55 (10.5) | 29.40 (13.1) | 89        | -<br>0.9<br>6 |          | .34      | 0.16             |                   |

\* *p* < .05.

**Supplemental Tables S2.** Comparison of Outcome Measures at Baseline Between the Retained and Excluded Participants After Randomization (N\_final = 148, N\_excluded = 61).

| Variables                           | Retained |                        | Excluded |                        | <i>t</i> -test | Cohen's <i>d</i> |
|-------------------------------------|----------|------------------------|----------|------------------------|----------------|------------------|
|                                     | <i>N</i> | <i>M</i> ( <i>SD</i> ) | <i>N</i> | <i>M</i> ( <i>SD</i> ) |                |                  |
| Emotional eating                    | 142      | 1.69 (0.82)            | 44       | 1.88 (0.92)            | -1.34          | 0.23             |
| Anxiety total <i>T</i> -score       | 141      | 51.43 (12.89)          | 41       | 50.61 (12.22)          | 0.36           | 0.06             |
| Separation anxiety/phobia           | 141      | 53.04 (11.35)          | 41       | 50.46 (11.72)          | 1.27           | 0.23             |
| Generalized anxiety disorder        | 141      | 49.89 (12.87)          | 41       | 49.00 (11.11)          | 0.40           | 0.07             |
| Social anxiety                      | 141      | 48.67 (11.69)          | 41       | 48.12 (10.09)          | 0.27           | 0.04             |
| Humiliation/rejection               | 141      | 48.12 (11.16)          | 41       | 47.71 (10.89)          | 0.21           | 0.03             |
| Performance fears                   | 141      | 49.91 (12.41)          | 41       | 48.59 (13.01)          | 0.59           | 0.11             |
| Obsessions and compulsions          | 141      | 55.02 (11.70)          | 41       | 55.39 (13.12)          | -0.17          | 0.03             |
| Physical symptoms                   | 141      | 52.40 (11.83)          | 41       | 53.41 (10.33)          | -0.50          | 0.08             |
| Panic                               | 141      | 53.13 (12.72)          | 41       | 54.78 (12.27)          | -0.74          | 0.13             |
| Tense and restless                  | 141      | 51.30 (10.78)          | 41       | 51.49 (10.26)          | -0.10          | 0.02             |
| Harm avoidance                      | 141      | 44.55 (12.22)          | 41       | 43.24 (13.09)          | 0.59           | 0.11             |
| Sleep quality                       | 148      | 3.86 (3.38)            | 61       | 3.46 (3.73)            | 0.77           | 0.12             |
| Sleep duration (hours)              | 136      | 8.61 (2.10)            | 41       | 7.83 (1.76)            | 2.18*          | 0.39             |
| Sleep efficiency (%)                | 99       | 88.24 (14.28)          | 32       | 85.35 (14.98)          | 0.98           | 0.20             |
| Sleep latency                       | 140      | 0.71 (0.85)            | 44       | 0.82 (0.79)            | -0.77          | 0.13             |
| Daily minutes MVPA <sup>a</sup>     | 73       | 26.34 (21.87)          | 28       | 34.61 (44.92)          | -1.24          | 0.28             |
| Daily dietary intake (servings/day) |          |                        |          |                        |                |                  |
| Fruits                              | 92       | 4.85 (5.19)            | 27       | 5.20 (5.02)            | -0.31          | 0.07             |
| Vegetables                          | 92       | 2.76 (4.41)            | 29       | 4.07 (4.99)            | -1.35          | 0.29             |
| Sweets                              | 92       | 2.00 (3.18)            | 27       | 2.39 (3.38)            | -0.54          | 0.12             |
| Sweetened beverages                 | 142      | 0.77(1.09)             | 46       | 1.06 (0.87)            | -1.60          | 0.27             |
| Percent body fat                    | 140      | 27.55 (10.47)          | 58       | 29.40 (13.06)          | -0.96          | 0.07             |

Note. aMVPA = moderate-to-vigorous physical activity.

\* *p* < .05.
